# Comparative effectiveness of extended release naltrexone and sublingual buprenorphine for treatment of opioid use disorder among Medicaid patients

Rachael K. Ross, Edward V. Nunes, Mark Olfson, Matisyahu Shulman,  
Noa Krawczyk, Elizabeth A. Stuart, Kara E. Rudolph

Affiliations: Department of Epidemiology, Mailman School of Public Health, Columbia University, New York, NY (Ross, Olfson, Rudolph); Department of Psychiatry, Columbia University Irving Medical Center (Nunes, Olfson, Shulman); New York State Psychiatric Institute, New York, NY (Nunes, Olfson, Shulman); Department of Population Health, New York University, New York, NY (Krawczyk); Department of Biostatistics, Bloomberg School of Public Health, Johns Hopkins University, Baltimore, MD (Stuart)

Corresponding author: Dr. Rachael Ross, Department of Epidemiology, Mailman School of Public Health, Columbia University, 722 W 168th St, New York, NY 10032; [rachael.k.ross@columbia.edu](mailto:rachael.k.ross@columbia.edu)

This version of the manuscript and associated files have been removed owing to concerns of data privacy.
